# Supplementary material for: Unique hierarchical SiO2@ZnIn2S4marigold flower like nanoheterostructure for solar hydrogen production
Source: Royal Society of Chemistry journal article supplement (doi:10.1039/d1ra01140e), 2021-01-01
Supplement: d1ra01140e1.pdf [file d1ra01140e1.pdf]

*Supporting information for*

## Unique Hierarchical SiO<sub>2</sub>@ZnIn<sub>2</sub>S<sub>4</sub> Marigold Flower like nanoheterostructure for solar hydrogen production

Aarti R. Gunjal,<sup>ab</sup> Yogesh A. Sethi,<sup>a</sup> Ujjwala V. Kawade,<sup>a</sup> Rajendra P. Panmand,<sup>c</sup> Chitra K. Ugale,<sup>a</sup> Jalindar D. Ambekar, Arvind V. Nagawade,<sup>b\*</sup> Bharat B. Kale<sup>a\*</sup>

**ESI Table1 : Comparison of rate of Photocatalytic H<sub>2</sub> Production of similar heterostructure system reported previously.**

| Photocatalyst                                                                                          | Sacrificial reagent system                                                                                             | Source        | H <sub>2</sub> Production rate From H <sub>2</sub> O | H <sub>2</sub> Production rate From H <sub>2</sub> S | Reference |
|--------------------------------------------------------------------------------------------------------|------------------------------------------------------------------------------------------------------------------------|---------------|------------------------------------------------------|------------------------------------------------------|-----------|
| ZnFe <sub>2</sub> O <sub>4</sub> /ZnIn <sub>2</sub> S <sub>4</sub>                                     | 0.35 M Na <sub>2</sub> S + 0.25 M Na <sub>2</sub> SO <sub>3</sub>                                                      | 300 W Xe-lamp | 79.0 μmol h <sup>-1</sup>                            | -                                                    | <b>a</b>  |
| CdS QDs/graphene/ZnIn <sub>2</sub> S <sub>4</sub>                                                      | Na <sub>2</sub> S (5 mL, 0.1 mol L <sup>-1</sup> ) + Na <sub>2</sub> SO <sub>3</sub> (5 mL, 0.04 mol L <sup>-1</sup> ) | 300 W Xe-lamp | 2.7 mmol h <sup>-1</sup>                             | -                                                    | <b>b</b>  |
| Cu-Doped ZnIn <sub>2</sub> S <sub>4</sub>                                                              | 0.25 M Na <sub>2</sub> S + 0.35 M Na <sub>2</sub> SO <sub>3</sub>                                                      | 300 W Xe-lamp | 151.5 μmol/h                                         | -                                                    | <b>c</b>  |
| AgIn <sub>5</sub> S <sub>8</sub> nanoparticles anchored on 2D layered ZnIn <sub>2</sub> S <sub>4</sub> | 0.25 M Na <sub>2</sub> S + 0.25 M Na <sub>2</sub> SO <sub>3</sub>                                                      | 300 W Xe-lamp | 265.9 μmol g <sup>-1</sup> h <sup>-1</sup>           | -                                                    | <b>d</b>  |
| NiS/ZnIn <sub>2</sub> S <sub>4</sub>                                                                   | 0.5 M Na <sub>2</sub> SO <sub>3</sub> + 0.43 M Na <sub>2</sub> S                                                       | 300 W Xe-lamp | 104.7 μmol/h                                         | -                                                    | <b>e</b>  |
| SnS@ZnIn <sub>2</sub> S <sub>4</sub>                                                                   | Na <sub>2</sub> S/Na <sub>2</sub> S <sub>2</sub> O <sub>3</sub>                                                        | Sunlight      | 650 μmol h <sup>-1</sup> g <sup>-1</sup>             | 6429 μmol h <sup>-1</sup> g <sup>-1</sup>            | <b>f</b>  |
| TiO <sub>2</sub> @ZnIn <sub>2</sub> S <sub>4</sub>                                                     | 0.25 M Na <sub>2</sub> S + 0.35 M Na <sub>2</sub> SO <sub>3</sub>                                                      | 300 W Xe-lamp | 348.21 μmol g <sup>-1</sup> h <sup>-1</sup>          | -                                                    | <b>g</b>  |

### References

- Yajie Chen, Guohui Tian, Wei Zhou, Yuting Xiao, Jinge Wang, Xin Zhang and Honggang Fu\* Nanoscale*
- Jungang Hou, Chao Yang, Huijie Cheng, Zheng Wang, Shuqiang Jiao\* and Hongmin Zhu Phys. Chem. Chem. Phys., 2013, 15, 15660–15668*
- Shaohua Shen, Liang Zhao, Zhaohui Zhou, and Liejin Guo J. Phys. Chem. C, Vol. 112, No. 41, 2008*
- Zhongjie Guana, b, \*, Zhiqiang Xuac, Qiuye Lia, \*, Peng Wang, Guoqiang Lib, and Jianjun Yanga, Applied Catalysis B: Environmental 2018*
- Liang Wei, Yongjuan Chen, Jialin Zhao and Zhaohui Li\* Beilstein J. Nanotechnol. 2013, 4, 949–955.*
- Aarti R. Gunjal, Aniruddha K. Kulkarni, Ujjwala V. Kawade, Yogesh A. Sethi, Ravindra S. Sonawane, Jin Oo-K Baeg, Arvind V. Nagawade, Bharat B. Kale Nanoscale Adv., 2020, 2, 2577-2586*
- Na Wei, Yanhao Wu, Mingliang Wang, Wenxia Sun, Zhenkui Li, Lei Ding, Hongzhi Cui Nanotechnology, Just accepted*
